# Supplementary material for: Improvements in Drill-Core Headspace Gas Analysis for Samples from Microbially Active Depths
Source: Hindawi journal article supplement (doi:10.1155/2018/2436814), 2018-10-01
Supplement: f1 [file 2436814.f1.pdf]

Table S1a Information on IsoJar<sup>TM</sup> samples of Funaki et al. (2012)

| Sample ID | Sampling date*<br>(dd/mm/yyyy) | Analysis date*<br>(dd/mm/yyyy) | Sampling depth of cores<br>(ground level -m) | $\delta^{13}\text{C}_{\text{CH}_4}$<br>(‰ VPDB) | $\delta^{13}\text{C}_{\text{CO}_2}$<br>(‰ VPDB) |
|-----------|--------------------------------|--------------------------------|----------------------------------------------|-------------------------------------------------|-------------------------------------------------|
| PB1-1     | 17/12/2007                     | 12/02/2008                     | 262.9                                        | -52.8                                           | +4.7                                            |
| PB1-2     | 18/12/2007                     | 12/02/2008                     | 274.4                                        | -48.8                                           | -2.6                                            |
| PB1-3     | 18/12/2007                     | 12/02/2008                     | 280.4                                        | -41.1                                           | -4.6                                            |
| PB1-4     | 18/12/2007                     | 12/02/2008                     | 288.0                                        | -53.3                                           | +4.2                                            |
| PB1-5     | 18/12/2007                     | 12/02/2008                     | 289.5                                        | -51.1                                           | +2.1                                            |
| PB1-6     | 19/12/2007                     | 12/02/2008                     | 299.2                                        | -53.6                                           | +3.7                                            |
| PB1-7     | 20/12/2007                     | 12/02/2008                     | 307.7                                        | -53.9                                           | +5.6                                            |
| PB1-8     | 21/12/2007                     | 13/02/2008                     | 316.9                                        | -50.6                                           | +4.1                                            |
| PB1-9     | 21/12/2007                     | 13/02/2008                     | 325.5                                        | -54.2                                           | +5.0                                            |
| PB1-10    | 22/12/2007                     | 13/02/2008                     | 336.1                                        | -52.4                                           | +9.3                                            |
| PB1-11    | 22/12/2007                     | 13/02/2008                     | 343.0                                        | -53.4                                           | +9.1                                            |
| PB1-12    | 23/12/2007                     | 13/02/2008                     | 355.0                                        | -49.1                                           | +12.2                                           |
|           |                                | 14/02/2008                     |                                              |                                                 |                                                 |
| PB1-13    | 18/01/2008                     | 14/02/2008                     | 367.0                                        | -55.5                                           | +6.8                                            |
| PB1-14    | 19/01/2008                     | 14/02/2008                     | 375.7                                        | -55.8                                           | +6.2                                            |
| PB1-15    | 20/01/2008                     | 14/02/2008                     | 385.0                                        | -54.7                                           | +8.7                                            |
| PB1-16    | 20/01/2008                     | 14/02/2008                     | 397.3                                        | -54.8                                           | +9.8                                            |
| PB1-17    | 21/01/2008                     | 15/02/2008                     | 405.7                                        | -51.8                                           | +3.9                                            |
| PB1-18    | 22/01/2008                     | 15/02/2008                     | 416.0                                        | -47.7                                           | -0.2                                            |
| PB1-19    | 23/01/2008                     | 15/02/2008                     | 425.4                                        | -56.1                                           | +3.6                                            |
| PB1-20    | 24/01/2008                     | 15/02/2008                     | 435.0                                        | -56.2                                           | +4.1                                            |
| PB1-21    | 24/01/2008                     | 15/02/2008                     | 445.0                                        | -53.8                                           | +3.0                                            |
| PB1-22    | 25/01/2008                     | 18/02/2008                     | 455.0                                        | -52.9                                           | +2.3                                            |
| PB1-23    | 26/01/2008                     | 18/02/2008                     | 465.0                                        | -53.6                                           | +3.5                                            |
|           |                                | 21/02/2008                     |                                              |                                                 |                                                 |
| PB1-24    | 28/01/2008                     | 18/02/2008                     | 485.0                                        | -55.8                                           | +4.8                                            |
|           |                                | 21/02/2008                     |                                              |                                                 |                                                 |
| PB1-25    | 30/01/2008                     | 20/02/2008                     | 504.0                                        | -51.9                                           | +0.7                                            |
| PB1-26    | 31/01/2008                     | 20/02/2008                     | 515.0                                        | -45.7                                           | +2.2                                            |
| PB1-27    | 31/01/2008                     | 20/02/2008                     | 520.0                                        | -49.5                                           | +0.9                                            |

\*These information are unpublished data in Funaki et al. (2012).

Table S1b Information on IsoJar<sup>TM</sup> samples of Funaki et al. (2012)

| Sample ID | Sampling date*<br>(dd/mm/yyyy) | Analysis date*<br>(dd/mm/yyyy) | Sampling depth of cores<br>(ground level -m) | $\delta^{13}\text{C}_{\text{CH}_4}$<br>(‰ VPDB) | $\delta^{13}\text{C}_{\text{CO}_2}$<br>(‰ VPDB) |
|-----------|--------------------------------|--------------------------------|----------------------------------------------|-------------------------------------------------|-------------------------------------------------|
| SAB1-1    | 31/10/2008                     | 04/02/2009                     | 150.2                                        | -31.5                                           | -1.7                                            |
| SAB1-2    | 05/11/2008                     | 04/02/2009                     | 160.0                                        |                                                 | -5.4                                            |
| SAB1-3    | 05/11/2008                     | 04/02/2009                     | 170.0                                        |                                                 | -5.2                                            |
| SAB1-4    | 06/11/2008                     | 04/02/2009                     | 180.0                                        | -26.3                                           | -10.0                                           |
| SAB1-5    | 06/11/2008                     | 06/02/2009                     | 190.0                                        | -31.4                                           | -5.4                                            |
| SAB1-6    | 07/11/2008                     | 06/02/2009                     | 200.0                                        | -54.5                                           | +3.7                                            |
| SAB1-7    | 07/11/2008                     | 06/02/2009                     | 210.0                                        | -13.4                                           | -7.0                                            |
| SAB1-8    | 07/11/2008                     | 06/02/2009                     | 220.0                                        | -49.9                                           | -2.4                                            |
| SAB1-9    | 08/11/2008                     | 06/02/2009                     | 230.0                                        | -55.9                                           | -6.8                                            |
| SAB1-10   | 08/11/2008                     | 10/02/2009                     | 240.0                                        | -37.6                                           | -2.0                                            |
| SAB1-11   | 08/11/2008                     | 10/02/2009                     | 250.0                                        | -40.3                                           | -9.5                                            |
| SAB1-12   | 09/11/2008                     | 10/02/2009                     | 260.0                                        | -15.0                                           | -12.4                                           |
| SAB1-13   | 09/11/2008                     | 10/02/2009                     | 270.0                                        | -53.8                                           | +3.1                                            |
| SAB1-14   | 10/11/2008                     | 10/02/2009                     | 280.0                                        | -48.1                                           | -2.7                                            |
| SAB1-15   | 20/11/2008                     | 10/02/2009                     | 290.0                                        | -43.6                                           | -8.4                                            |
| SAB1-16   | 11/11/2008                     | 12/02/2009                     | 300.2                                        | -52.1                                           | -0.9                                            |
| SAB1-17   | 03/12/2008                     | 12/02/2009                     | 310.1                                        | -48.8                                           | -2.4                                            |
| SAB1-18   | 04/12/2008                     | 12/02/2009                     | 320.0                                        | -38.4                                           | -9.0                                            |
| SAB1-19   | 13/12/2008                     | 12/02/2009                     | 330.1                                        | -50.2                                           | -0.6                                            |
|           |                                | 25/02/2009                     |                                              |                                                 |                                                 |
| SAB1-20   | 14/12/2008                     | 12/02/2009                     | 340.0                                        | -50.2                                           | +2.9                                            |
| SAB1-21   | 15/12/2008                     | 19/02/2009                     | 350.0                                        | -52.1                                           | +6.5                                            |
| SAB1-22   | 15/12/2008                     | 19/02/2009                     | 360.0                                        | -37.0                                           | -2.3                                            |
| SAB1-23   | 16/12/2008                     | 19/02/2009                     | 370.0                                        | -50.2                                           | +0.5                                            |
| SAB1-24   | 16/12/2008                     | 19/02/2009                     | 379.4                                        | -33.6                                           | -3.7                                            |
| SAB1-25   | 18/12/2008                     | 19/02/2009                     | 399.0                                        | -46.3                                           | +0.4                                            |
| SAB1-26   | 06/01/2009                     | 20/02/2009                     | 410.0                                        | -50.3                                           | +3.6                                            |
| SAB1-27   | 07/01/2009                     | 20/02/2009                     | 420.7                                        | -41.4                                           | -3.5                                            |
| SAB1-28   | 08/01/2009                     | 20/02/2009                     | 430.0                                        | -45.9                                           | -2.6                                            |
| SAB1-29   | 08/01/2009                     | 20/02/2009                     | 440.0                                        | -40.1                                           | +0.8                                            |
| SAB1-30   | 09/01/2009                     | 24/02/2009                     | 450.0                                        | -31.6                                           | -0.1                                            |
| SAB1-31   | 11/01/2009                     | 24/02/2009                     | 470.0                                        | -46.8                                           | +0.8                                            |
| SAB1-32   | 11/01/2009                     | 24/02/2009                     | 480.0                                        |                                                 | -4.0                                            |
| SAB1-33   | 12/01/2009                     | 24/02/2009                     | 490.0                                        | -20.5                                           | -2.0                                            |
| SAB1-34   | 13/01/2009                     | 24/02/2009                     | 500.0                                        | -23.0                                           | -4.7                                            |
| SAB1-35   | 13/01/2009                     | 25/02/2009                     | 510.0                                        | -48.0                                           | -6.4                                            |

\*These information are unpublished data in Funaki et al. (2012).

Table S2 Information on IsoJar™ samples and analytical results of head-space gases

| Sample no. | Sampling date<br>(dd/mm/yyyy) | Analysis date<br>(dd/mm/yyyy) | Sampling depth of cores<br>(ground level -m) | C <sub>2</sub> H <sub>6</sub><br>(ppm) | C <sub>3</sub> H <sub>8</sub><br>(ppm) | $\delta^{13}\text{C}_{\text{CO}_2} - \delta^{13}\text{C}_{\text{CH}_4}$<br>(‰ VPDB) |
|------------|-------------------------------|-------------------------------|----------------------------------------------|----------------------------------------|----------------------------------------|-------------------------------------------------------------------------------------|
| IJ1        | 10/11/2016                    | 16/1/2017                     | 384.9–385.9                                  | 1                                      | nd*                                    | 59.0                                                                                |
| IJ2        | 06/12/2016                    | 16/1/2017                     | 395.0–396.0                                  | 15                                     | nd*                                    | 48.7                                                                                |
| IJ3        | 19/12/2016                    | 08/03/2017                    | 413.4–415.4                                  | 15                                     | nd*                                    | 44.0                                                                                |
| IJ4        | 02/12/2016                    | 19/12/2016                    | 394.5–395.0                                  | 5                                      | nd*                                    | 54.3                                                                                |
| IJ5        | 10/11/2016                    | 17/01/2017                    | 384.9–385.9                                  | 1                                      | nd*                                    | 53.5                                                                                |
| IJ6        | 06/12/2016                    | 17/01/2017                    | 395.0–396.0                                  | 26                                     | nd*                                    | 46.0                                                                                |
| IJ7        | 19/12/2016                    | 08/03/2017                    | 415.4–416.3                                  | 21                                     | nd*                                    | 35.8                                                                                |
| IJ8        | 19/12/2016                    | 08/03/2017                    | 413.4–415.4                                  | 2                                      | nd*                                    | 20.9                                                                                |
| IJ9        | 10/11/2016                    | 29/11/2016                    | 382.8–383.8                                  | 18                                     | 2                                      | 72.9                                                                                |
| IJ10       | 10/11/2016                    | 16/01/2017                    | 384.9–385.9                                  | 15                                     | nd*                                    | 55.2                                                                                |
| IJ11       | 06/12/2016                    | 16/01/2017                    | 395.0–396.0                                  | 35                                     | nd*                                    | 64.5                                                                                |
| IJ12       | 06/12/2016                    | 08/03/2017                    | 394.5–396.0                                  | 4                                      | nd*                                    | 39.7                                                                                |
| IJ13       | 10/11/2016                    | 29/11/2016                    | 383.8–384.9                                  | 37                                     | 2                                      | 61.3                                                                                |
| IJ14       | 10/11/2016                    | 17/01/2017                    | 384.9–385.9                                  | 1                                      | nd*                                    | -2.0                                                                                |
| IJ15       | 06/12/2016                    | 17/01/2017                    | 395.0–396.0                                  | 24                                     | nd*                                    | 49.7                                                                                |
| IJ16       | 19/12/2016                    | 08/03/2017                    | 413.4–415.4                                  | 9                                      | nd*                                    | 40.7                                                                                |
| IJ17       | 10/11/2016                    | 29/11/2016                    | 382.8–383.8                                  | 5                                      | 1                                      | 64.7                                                                                |
| IJ18       | 10/11/2016                    | 16/01/2017                    | 383.8–384.9                                  | 11                                     | nd*                                    | 58.1                                                                                |
| IJ19       | 06/12/2016                    | 16/01/2017                    | 395.0–396.0                                  | 37                                     | 2                                      | 62.9                                                                                |
| IJ20       | 19/12/2016                    | 08/03/2017                    | 413.4–415.4                                  | 21                                     | nd*                                    | 60.6                                                                                |
| IJ21       | 10/11/2016                    | 29/11/2016                    | 383.8–384.9                                  | 5                                      | nd*                                    | 50.0                                                                                |
| IJ22       | 10/11/2016                    | 17/01/2017                    | 383.8–384.9                                  | 10                                     | nd*                                    | 29.5                                                                                |
| IJ23       | 06/12/2016                    | 17/01/2017                    | 395.0–396.0                                  | 24                                     | nd*                                    | 47.0                                                                                |
| IJ24       | 19/12/2016                    | 08/03/2017                    | 413.4–415.4                                  | 28                                     | nd*                                    | 44.0                                                                                |
| IJ25       | 19/12/2016                    | 08/03/2017                    | 415.4–416.3                                  | 33                                     | nd*                                    | 46.7                                                                                |
| IJ26       | 22/02/2017                    | 27/02/2017                    | 470.0–470.4                                  | 17                                     | nd*                                    | 69.9                                                                                |
| IJ27       | 22/02/2017                    | 27/02/2017                    | 470.0–470.4                                  | 16                                     | nd*                                    | 68.6                                                                                |
| IJ28       | 22/02/2017                    | 27/02/2017                    | 470.0–470.4                                  | 11                                     | nd*                                    | 70.6                                                                                |

\*nd = not detected.

Table S3 Information on IsoJar<sup>TM</sup> samples and analytical results of head-space gases for Section 3.1.2

| Sample no. | Sampling date<br>(dd/mm/yyyy) | Analysis date<br>(dd/mm/yyyy) | C <sub>2</sub> H <sub>6</sub><br>(ppm) | C <sub>3</sub> H <sub>8</sub><br>(ppm) | $\delta^{13}\text{C}_{\text{CO}_2} - \delta^{13}\text{C}_{\text{CH}_4}$<br>(‰ VPDB) |
|------------|-------------------------------|-------------------------------|----------------------------------------|----------------------------------------|-------------------------------------------------------------------------------------|
| IJ29       | 28/06/2017                    | 25/07/2017                    | 2                                      | 4                                      | 62.5                                                                                |
| IJ30       | 28/06/2017                    | 25/07/2017                    | 1                                      | 3                                      | 89.8                                                                                |
| IJ31       | 28/06/2017                    | 25/07/2017                    | 2                                      | 5                                      | 88.2                                                                                |
| IJ32       | 28/06/2017                    | 25/07/2017                    | 2                                      | 5                                      | 97.8                                                                                |
| IJ33       | 28/06/2017                    | 25/07/2017                    | 3                                      | 5                                      | 102.4                                                                               |
| IJ34       | 28/06/2017                    | 26/07/2017                    | 3                                      | 4                                      | 88.7                                                                                |
| IJ35       | 28/06/2017                    | 26/07/2017                    | 8                                      | 9                                      | 71.0                                                                                |
| IJ36       | 28/06/2017                    | 26/07/2017                    | 11                                     | 9                                      | 102.8                                                                               |
| IJ37       | 28/06/2017                    | 26/07/2017                    | 5                                      | 2                                      | 71.0                                                                                |
| IJ38       | 28/06/2017                    | 26/07/2017                    | 4                                      | 2                                      | 72.4                                                                                |
| IJ39       | 28/06/2017                    | 27/07/2017                    | 7                                      | 4                                      | 68.2                                                                                |
| IJ40       | 28/06/2017                    | 27/07/2017                    | 9                                      | 8                                      | 71.2                                                                                |
| IJ41       | 28/06/2017                    | 27/07/2017                    | 3                                      | 2                                      | 74.0                                                                                |
| IJ42       | 28/06/2017                    | 27/07/2017                    | 1                                      | 2                                      | 78.0                                                                                |
| IJ43       | 28/06/2017                    | 27/07/2017                    | 2                                      | 2                                      | 80.4                                                                                |
| IJ44       | 28/06/2017                    | 27/07/2017                    | 2                                      | 3                                      | 74.9                                                                                |
| IJ45       | 28/06/2017                    | 28/07/2017                    | 2                                      | 3                                      | 77.8                                                                                |
| IJ46       | 28/06/2017                    | 28/07/2017                    | 2                                      | 3                                      | 77.1                                                                                |
| IJ47       | 28/06/2017                    | 28/07/2017                    | 2                                      | 2                                      | 78.9                                                                                |
| IJ48       | 28/06/2017                    | 28/07/2017                    | 2                                      | 4                                      | 78.2                                                                                |

Table S4 Carbon isotope ratios in methane, and total inorganic carbon (TIC), methane, and TIC contents in EV samples

| Sample no. | Sampling date<br>(dd/mm/yyyy) | Analysis date<br>(dd/mm/yyyy) | Storage period<br>(days) | Sampling depth<br>of groundwater<br>(ground level -m) | $\delta^{13}\text{C}_{\text{CH}_4}$<br>(‰ VPDB) | $\delta^{13}\text{C}_{\text{CO}_2}$<br>(‰ VPDB) | $\delta^{13}\text{C}_{\text{CO}_2} - \delta^{13}\text{C}_{\text{CH}_4}$<br>(‰ VPDB) | Concentration<br>of dissolved $\text{CH}_4$<br>(mmol kg <sup>-1</sup> ) | Concentration of total<br>inorganic carbon (TIC)<br>(mmol kg <sup>-1</sup> ) |
|------------|-------------------------------|-------------------------------|--------------------------|-------------------------------------------------------|-------------------------------------------------|-------------------------------------------------|-------------------------------------------------------------------------------------|-------------------------------------------------------------------------|------------------------------------------------------------------------------|
| EV1        | 26/10/2016                    | 01/11/2016                    | 6                        | 248.5                                                 | -56.7                                           | +17.1                                           | 73.8                                                                                | -                                                                       | -                                                                            |
| EV2        | 26/10/2016                    | 20/12/2016                    | 55                       | 248.5                                                 | -54.0                                           | +17.8                                           | 71.8                                                                                | 7.8                                                                     | -                                                                            |
| EV3        | 26/10/2016                    | 01/02/2017                    | 98                       | 248.5                                                 | -53.7                                           | +17.3                                           | 71.0                                                                                | 8.5                                                                     | -                                                                            |
| EV4        | 26/10/2016                    | 01/11/2016                    | 6                        | 248.5                                                 | -56.8                                           | +16.9                                           | 73.7                                                                                | 8.7                                                                     | 42                                                                           |
| EV5        | 26/10/2016                    | 20/12/2016                    | 55                       | 248.5                                                 | -54.5                                           | +16.2                                           | 70.6                                                                                | 6.7                                                                     | 37                                                                           |
| EV6        | 26/10/2016                    | 01/02/2017                    | 98                       | 248.5                                                 | -52.7                                           | +16.7                                           | 69.4                                                                                | 6.7                                                                     | 35                                                                           |
